# Supplementary material for: Changes in inflammatory plasma proteins from patients with chronic pain associated with treatment in an interdisciplinary multimodal rehabilitation program – an explorative multivariate pilot study
Source: publisher site journal article supplement (doi:10.1515/sjpain-2019-0088), 2019-10-04
Supplement: Supplementary file 1 [file sjpain-2019-0088_suppl.docx]

**Supplementary Table S1**. List of the inflammatory substances used in the MSD analysis, with LLOD-ULOD depicted below each substance (pg/mL). In parenthesis synonym.

| CTACK (CCL27)  1.8 – 4.200 | IL-12p70  0.69 – 5.300 | IL-23  1.4 – 21.600 | MCP-4 (CCL13)  7.5 – 3.800 |
| --- | --- | --- | --- |
| ENA-78 (CXCL5)  0.53 – 3.900 | IL-13 (P600)  3.1 – 1.900 | IL-27  9.6 – 50.600 | M-CSF (CSF-1)  0.29 – 2.000 |
| Eotaxin (CCL11)  3.2 – 4.800 | IL-15  0.82 – 3.000 | IL-29/IFN-λ1  1.2 – 11.800 | MDC (CCL22)  8.4 – 20.100 |
| Eotaxin-2 (CCL24)  3.1 – 6.000 | IL-16 (LCF)  6.6 – 21.500 | IL-2Ra 10 – 55.000 | MIF  4.3 – 27.000 |
| Eotaxin-3 (CCL26)  7.3 – 21.400 | IL-17A  2.6 – 23.400 | IL-3  11 – 16.000 | MIP-1α  7.7 – 4.200 |
| EPO (erythropoietin)  1.8 – 20.000 | IL-17A/F  1.84 – 18.400 | IL-31  7.3 – 11.000 | MIP-1β  1.5 – 1.600 |
| FLT3L (Fms-related tyrosine kinase 3 ligand)  0.49 – 6.000 | IL-17B  0.79 – 4.000 | IL-33  0.59 – 10.300 | MIP-3β  0.67 – 2.000 |
| Fractalkine (CX3CL1)  102 –180.800 | IL-17C  2.2 – 20.000 | IL-4  0.08 – 2.100 | MIP-5 (CCL15)  0.34 – 30.000 |
| G-CSF (CSF-3)  1.6 – 20.400 | IL-17D  4.8 – 40.000 | IL-5 (BCDF-1)  0.24 – 4.000 | SDF-1α (CXCL12)  278 – 103.200 |
| GM-CSF (CSF-2)  0.12 – 9.400 | IL-17E/IL-25  0.58 – 9.200 | IL-6 (IFN-beta2, BSF-2)  0.33 – 2.000 | TARC (CCL17)  0.51 – 2.200 |
| GRO-α (CXCL1)  0.25 – 2.500 | IL-17F  155 – 112.000 | IL-7  1.5 – 7.000 | TNF-α (cachectin)  0.54 – 3.700 |
| I-309 (CCL1)  6.8 – 3.000 | IL-1RA (IL-1 receptor antagonist)  1.7 – 5.000 | IL-8  0.15 – 2.200 | TNF-β (LT-alpha)  0.47 – 4.300 |
| IFN-α2a  4.0 – 42.400 | IL-1α (hematopoietin-1)  0.98 – 5.100 | IL-9  0.14 – 1.500 | TPO (MGDF)  19 – 40.400 |
| IFN-β  3.1 – 100.000 | IL-1β (catabolin)  0.15 – 3.800 | IP-10 (CXCL10)  0.49 – 6.000 | TRAIL (Apo2L)  0.66 – 10.000 |
| IFN-γ  1.7 – 17.000 | IL-2 (T cell growth factor)  0.70 – 1.900 | MCP-1 (CCL2, MCAF)  0.74 – 6.600 | TSLP  0.20 – 10.100 |
| IL-10 (CSIF)  0.14 – 3.700 | IL-21  1.2 – 12.600 | MCP-2 (CCL8)  0.11 – 2.000 | VEGF-A  2.0 – 4.900 |
| IL-12/IL-23p40  2.8 – 21.000 | IL-22  0.13 – 3.400 | MCP-3 (CCL7)  0.79 – 5.000 | YKL-40  0.39 – 5.000 |

**Supplementary Table S2**. Mean and standard deviation (SD) pre-IMMRP and 12-m follow up for the 60 out of 68 substances identified and included in the study.

| Substance | pre-IMMRP | | 12-m FU |  |
| --- | --- | --- | --- | --- |
|  | Mean | SD | Mean | SD |
| CTACK/CCL27 | 666.20 | 238.16 | 671.62 | 284.22 |
| ENA-78/CXCL5 | 66.71 | 48.22 | 30.92 | 23.94 |
| Eotaxin/CCL11 | 97.45 | 37.52 | 97.75 | 42.79 |
| Eotaxin-2/CCL24 | 519.19 | 406.93 | 485.85 | 404.74 |
| Eotaxin-3/CCL26 | 11.51 | 21.59 | 18.70 | 37.05 |
| EPO | 31.45 | 17.20 | 37.94 | 39.77 |
| FLT3L | 76.98 | 34.40 | 78.55 | 32.44 |
| Fractalkine/CXCL1 | 5186.89 | 1020.15 | 5084.83 | 1198.20 |
| G-CSF/CSF-3 | 6.30 | 7.21 | 6.15 | 4.25 |
| GM-CSF/CSF-2 | 0.02 | 0.06 | 0.05 | 0.16 |
| GRO- α/CXCL1 | 24.31 | 10.04 | 17.82 | 9.20 |
| I-309/CCL1 | 15.42 | 9.24 | 13.42 | 7.05 |
| IFN-α2a | 0.13 | 0.14 | 0.11 | 0.15 |
| IFN-β | 5.05 | 8.52 | 4.57 | 8.19 |
| IFN-γ | 3.01 | 1.98 | 3.59 | 3.04 |
| IL-10/CSIF | 0.18 | 0.61 | 0.14 | 0.29 |
| IL-12/IL-23p40 | 67.27 | 41.49 | 70.85 | 46.08 |
| IL-12p70 | 0.14 | 0.30 | 0.15 | 0.25 |
| IL-13 | 6.09 | 5.81 | 6.14 | 5.13 |
| IL-15 | 1.41 | 0.63 | 1.29 | 0.43 |
| IL-16/LCF | 100.37 | 40.52 | 90.09 | 30.98 |
| IL-17B | 0.82 | 0.48 | 0.81 | 0.44 |
| IL-17C | 1.27 | 1.41 | 1.05 | 0.82 |
| IL-17D | 6.22 | 6.59 | 5.52 | 4.24 |
| IL-17E/IL-25 | 1.69 | 2.55 | 1.20 | 3.14 |
| IL-17F | 842.99 | 1351.58 | 731.30 | 1354.04 |
| IL-1RA | 141.09 | 92.71 | 135.65 | 71.13 |
| IL-21 | 5280.94 | 3565.56 | 5071.18 | 3480.52 |
| IL-22 | 2.20 | 5.29 | 1.89 | 7.30 |
| IL-23 | 3.61 | 5.48 | 1.80 | 4.68 |
| IL-27 | 326.82 | 148.61 | 305.51 | 155.56 |
| IL-29/IFN-λ1 | 812.29 | 632.81 | 823.42 | 617.91 |
| IL-2Ra | 545.50 | 198.75 | 570.63 | 372.72 |
| IL-33 | 2.34 | 4.27 | 0.94 | 1.28 |
| IL-4 | 0.05 | 0.16 | 0.03 | 0.07 |
| IL-5/BCDF-1 | 0.10 | 0.09 | 0.13 | 0.16 |
| IL-6/IFN- β2 | 0.27 | 0.20 | 0.30 | 0.21 |
| IL-7 | 0.69 | 0.52 | 0.40 | 0.37 |
| IL-8 | 1.50 | 0.65 | 1.31 | 0.49 |
| IL-9 | 0.16 | 0.11 | 0.15 | 0.09 |
| IP-10/CXCL10 | 139.48 | 142.23 | 97.18 | 63.29 |
| MCP-1/CCL2 | 93.92 | 34.16 | 87.17 | 37.08 |
| MCP-2/CCL8 | 13.02 | 4.36 | 12.80 | 4.22 |
| MCP-3/CCL7 | 7.51 | 3.67 | 7.43 | 3.77 |
| MCP-4/CCL13 | 54.41 | 24.98 | 48.74 | 16.84 |
| M-CSF/CSF-1 | 2.12 | 0.65 | 2.11 | 0.74 |
| MDC/CCL22 | 588.40 | 183.76 | 566.14 | 161.69 |
| MIF | 15936.30 | 6691.56 | 13525.12 | 6525.52 |
| MIP-1α | 7.19 | 4.47 | 8.78 | 3.98 |
| MIP-1β | 28.46 | 15.08 | 27.95 | 15.30 |
| MIP-3β | 100.70 | 59.39 | 110.63 | 87.65 |
| MIP-5/CCL15 | 15778.47 | 32685.30 | 10334.06 | 4436.52 |
| SDF-1alpha/CXCL12 | 617.51 | 239.78 | 552.48 | 199.21 |
| TARC/CCL17 | 19.03 | 11.59 | 13.13 | 5.03 |
| TNF-α | 1.52 | 1.58 | 1.35 | 1.19 |
| TNF-β | 0.05 | 0.05 | 0.05 | 0.04 |
| TPO/MGDF | 153.93 | 57.75 | 148.37 | 55.77 |
| TRAIL | 112.13 | 40.32 | 110.89 | 37.75 |
| VEGF-A | 9.06 | 6.31 | 7.05 | 4.03 |
| YKL-40 | 14196.96 | 2148.46 | 14451.82 | 2315.64 |
